# Supplementary material
Source: MDPI journal article supplement (https://www.mdpi.com/2079-8954/11/9/462)
Supplement: s1 [file s1]

**Table S1.** Themes in MNH referral systems in the three study provinces/districts.

| Dimensions                                                            | Province 1 (P1), District 1 (D1)                                                                                                                                                                                                                                                                                                                                                                                                                                                                                                                                                                          | Province 2 (P2), District 2 (D2)                                                                                                                                                                                                                                                                                                                                                                                                                                                                                                                                                                                                                                            | Province 3 (P3), District 3 (D3)                                                                                                                                                                                                                                                                                                                                                                                                                                                                                                                                                                                                                                                      |
|-----------------------------------------------------------------------|-----------------------------------------------------------------------------------------------------------------------------------------------------------------------------------------------------------------------------------------------------------------------------------------------------------------------------------------------------------------------------------------------------------------------------------------------------------------------------------------------------------------------------------------------------------------------------------------------------------|-----------------------------------------------------------------------------------------------------------------------------------------------------------------------------------------------------------------------------------------------------------------------------------------------------------------------------------------------------------------------------------------------------------------------------------------------------------------------------------------------------------------------------------------------------------------------------------------------------------------------------------------------------------------------------|---------------------------------------------------------------------------------------------------------------------------------------------------------------------------------------------------------------------------------------------------------------------------------------------------------------------------------------------------------------------------------------------------------------------------------------------------------------------------------------------------------------------------------------------------------------------------------------------------------------------------------------------------------------------------------------|
| <b>Overall functioning</b>                                            | <ul style="list-style-type: none"> <li>Perceived to be functioning well, although constrained by structural and emerging challenges, notably <ul style="list-style-type: none"> <li>Lack of District Hospital (DH) beds in parts of metro</li> <li>Staffing setbacks, incl. EMS</li> </ul> </li> </ul>                                                                                                                                                                                                                                                                                                    | <ul style="list-style-type: none"> <li>Perceived to be improving although 'not 100% smooth'</li> <li>MNH referral relationships between PHC and DH functioned unevenly across the district</li> </ul>                                                                                                                                                                                                                                                                                                                                                                                                                                                                       | <ul style="list-style-type: none"> <li>Perceived to be a major challenge, hampered by <ul style="list-style-type: none"> <li>critical weaknesses in EMS</li> <li>referral pathways not fit for purpose</li> </ul> </li> </ul>                                                                                                                                                                                                                                                                                                                                                                                                                                                         |
| <b>A referral policy/strategy</b>                                     | <ul style="list-style-type: none"> <li>Provincial and district policies in place with appropriate forms and documentation, and agreement on referral pathways</li> </ul>                                                                                                                                                                                                                                                                                                                                                                                                                                  | <ul style="list-style-type: none"> <li>Provincial policy and district standard operating procedures in place, but needed to be (re)negotiated between all key players in each locality to address: <ul style="list-style-type: none"> <li>Appropriateness of referrals and distribution of deliveries between CHCs and DHs</li> <li>Regional Hospital (RH) providing DH services for immediate catchment area</li> <li>Patient movement across the boundaries of the sub-district, districts and neighbouring provinces through Service Level Agreements (SLAs)</li> </ul> </li> </ul>                                                                                      | <ul style="list-style-type: none"> <li>Provincial policy in place, but described as 'desk top', unable to address complex realities on the ground, including: <ul style="list-style-type: none"> <li>Resource implications of cross border service utilisation, spanning sub-districts, districts, neighbouring provinces and countries (Swaziland, Mozambique)</li> <li>RH providing DH services for immediate catchment areas</li> <li>No SOPs enabling bypassing when requisite expertise unavailable at the next level in the referral pathway</li> </ul> </li> <li>With support of partners, agreements on referral pathways negotiated in specific sub-districts</li> </ul>     |
| <b>Adequately resourced sending and receiving referral facilities</b> | <ul style="list-style-type: none"> <li>'Distorted service delivery platform' as a legacy of apartheid hospital planning <ul style="list-style-type: none"> <li>In one sub-district of the metro three hospitals providing regional and tertiary services and no DH</li> <li>In another sub-district, a DH having capabilities (neonatal ICU, obstetricians) equivalent to next referral hospital, but inadequate support services e.g. blood bank</li> </ul> </li> <li>Considerable everyday management (through system brokers) and up-and-down swapping of beds/patients across the platform</li> </ul> | <ul style="list-style-type: none"> <li>Perceived imbalance in maternal deliveries between CHCs and DH <ul style="list-style-type: none"> <li>24-hour CHCs staffed with midwives, with potential to do more deliveries but lack doctor support</li> <li>DH staffed with doctors, but acute shortage of midwives</li> </ul> </li> <li>Availability of obstetricians at RH, but similar shortage of midwives and limited beds/physical infrastructure</li> <li>Goal is for a high care neonatal unit in each district hospital able to provide CPAP and presence of motivated/skilled staff, but hampered by availability of essential supplies such as medical air</li> </ul> | <ul style="list-style-type: none"> <li>Perceived imbalance in maternal deliveries between CHCs and DH (as in P2) <ul style="list-style-type: none"> <li>Successfully negotiated a shift in uncomplicated deliveries towards CHCs in one sub-district</li> <li>DH staffed with doctors, but acute shortage of midwives</li> </ul> </li> <li>Presence of a well-functioning MNH service in one RH, with adequate staffing and recent upgrading of neonatal ICU</li> <li>DH have capacity to provide neonatal high care (e.g. staff, CPAP), but relatively minor bottlenecks in supplies (e.g. piping for CPAP), equipment (e.g. a theatre bed) hampered delivery of services</li> </ul> |

|                                                               |                                                                                                                                                                                                                                                                                                                                                                                                                                                                                                                                                                                                                                                                                                                                      |                                                                                                                                                                                                                                                                                                                                                                                                                                                                                                                                                                                                                                                                                                                                                               |                                                                                                                                                                                                                                                                                                                                                                                                                                                                                                                                                                                                                                                                                                   |
|---------------------------------------------------------------|--------------------------------------------------------------------------------------------------------------------------------------------------------------------------------------------------------------------------------------------------------------------------------------------------------------------------------------------------------------------------------------------------------------------------------------------------------------------------------------------------------------------------------------------------------------------------------------------------------------------------------------------------------------------------------------------------------------------------------------|---------------------------------------------------------------------------------------------------------------------------------------------------------------------------------------------------------------------------------------------------------------------------------------------------------------------------------------------------------------------------------------------------------------------------------------------------------------------------------------------------------------------------------------------------------------------------------------------------------------------------------------------------------------------------------------------------------------------------------------------------------------|---------------------------------------------------------------------------------------------------------------------------------------------------------------------------------------------------------------------------------------------------------------------------------------------------------------------------------------------------------------------------------------------------------------------------------------------------------------------------------------------------------------------------------------------------------------------------------------------------------------------------------------------------------------------------------------------------|
|                                                               | <ul style="list-style-type: none"> <li>Adequate staffing of doctors, but acute shortages in nursing staff, especially midwives at lower levels of the system</li> <li>Well established midwife obstetric units (MOUs) in the metro, with medical support</li> </ul>                                                                                                                                                                                                                                                                                                                                                                                                                                                                  | <ul style="list-style-type: none"> <li>Neonatal ICU in regional hospital, staffed by a paediatrician, but insufficient beds</li> <li>Appointment of provincial tertiary level specialists with responsibility for supporting lower levels</li> </ul>                                                                                                                                                                                                                                                                                                                                                                                                                                                                                                          | <ul style="list-style-type: none"> <li>RH and TH have overlapping profile of services and competencies, also a legacy of apartheid hospital planning <ul style="list-style-type: none"> <li>Scope for rationalisation and agreement on bypassing to quaternary services in other provinces</li> </ul> </li> </ul>                                                                                                                                                                                                                                                                                                                                                                                 |
| <b>Functioning emergency medical services (EMS)</b>           | <ul style="list-style-type: none"> <li>420 ambulances, ratio of 1 per 15,000 population [interview data, Nov 2022]</li> <li>EMS obstetric emergency urban inter-facility transfer under 30 minutes rate: 44% (2019/20) [National Indicator Data Set]</li> <li>EMS considered largely unproblematic 'within boundaries of the metro'</li> <li>Sufficient vehicles, but staffing an emerging issue <ul style="list-style-type: none"> <li>COVID contract posts terminated</li> <li>National regulations on minimum skill level</li> </ul> </li> <li>Enabled though informal relationships between EMS and managers at sub-district level</li> <li>At district level EMS functions as 'an island', reporting to the province</li> </ul> | <ul style="list-style-type: none"> <li>262 ambulances, ratio of 1 per 23,000 population [news report, May 2023]</li> <li>EMS obstetric emergency rural inter-facility transfer under 60 minutes rate: 30% (2019/20)</li> <li>EMS Priority 1 rural obstetric response under 40 minutes rate: 41% (2019/20) [National Indicator Data Set]</li> <li>EMS considered to be reasonably functional at district level</li> <li>Have ambulances stationed at facilities (CHC and hospitals) although still need to go via central EMS call centre</li> <li>Joint manager/EMS WhatsApp groups in emergencies</li> <li>Would like more obstetric ambulances</li> <li>Steps at provincial level to upgrade skill levels of EMS, following national regulations</li> </ul> | <ul style="list-style-type: none"> <li>72 functioning ambulances, ratio of 1 per 65,000 population [provincial parliamentary report, Feb 2023]</li> <li>No routine EMS data reported in National Indicator Data Set</li> <li>EMS source of 'massive trouble', with delays of up to 8 hours for emergency transfers</li> <li>Critical shortage of and inadequately equipped ambulances</li> <li>Lack of competencies in triaging and prioritisation at the EMS call centre</li> <li>No ambulances stationed at health facilities</li> </ul>                                                                                                                                                        |
| <b>Communication and collaboration between levels of care</b> | <ul style="list-style-type: none"> <li>Weak collaboration and communication between PHC and regional hospitals where no DH intermediary</li> <li>District programme managers and specialists broker relationships and address day-to-day problems between hospitals</li> <li>Lack of feedback on referred cases</li> <li>Clinical managers of all hospitals (DH, RH, TH) in metro have a regular forum and address referral and outreach issues</li> <li>System strengthening through Mphatlalatsane initiatives</li> </ul>                                                                                                                                                                                                          | <ul style="list-style-type: none"> <li>Relationship between PHC system and DH variable between sub-districts</li> <li>Collaborative relationships between DHs and RH, and between RH and TH improved, through active efforts of district management team</li> <li>District managers, specialist clinicians in district and province, and partners broker relationships and communication between levels</li> <li>Lack of feedback on referred cases</li> <li>Communication hampered by network availability</li> <li>Multiple WhatsApp groups connecting players, including EMS within district and beyond; accelerated with COVID</li> </ul>                                                                                                                 | <ul style="list-style-type: none"> <li>Lack of structured relationships between PHC system and DH managers</li> <li>Collaborative relationships between one RH and DHs in the referral 'wedge' improved with support and brokerage by partners</li> <li>Lack of structured relationship ('interdepartmental forum') between managers at RH and TH</li> <li>District clinical specialist, programme managers and partners broker relationships and support system strengthening, but lack <ul style="list-style-type: none"> <li>jurisdiction over RH and TH</li> <li>authority to improve supply chains</li> </ul> </li> <li>Plans to introduce a national m-health referral app, Vula</li> </ul> |

|  |  |                                                                                                                                                                          |                                                                                                                                                                                                                                                                                  |
|--|--|--------------------------------------------------------------------------------------------------------------------------------------------------------------------------|----------------------------------------------------------------------------------------------------------------------------------------------------------------------------------------------------------------------------------------------------------------------------------|
|  |  | <ul style="list-style-type: none"><li>• Provincial level Neonatal Response Team, builds relationships between TH and RH, incl. in referral of individual cases</li></ul> | <ul style="list-style-type: none"><li>• RH established a forum for nursing managers in catchment area, including DH, PHC and EMS</li><li>• Clinical managers meet regularly in a provincial forum, negotiate sharing of specialised clinical resources across platform</li></ul> |
|--|--|--------------------------------------------------------------------------------------------------------------------------------------------------------------------------|----------------------------------------------------------------------------------------------------------------------------------------------------------------------------------------------------------------------------------------------------------------------------------|

**Table S2.** Themes in MNH outreach systems in the three provinces/districts

| Dimensions                          | Province 1 (P1), District 1 (D1)                                                                                                                                                                                                                                                                                                                                                                                                                                                                                                                    | Province 2 (P2), District 2 (D2)                                                                                                                                                                                                                                                                                                                                                                                                                                                                                                                          | Province 3 (P3), District 3 (D3)                                                                                                                                                                                                                                                                                                                                                                           |
|-------------------------------------|-----------------------------------------------------------------------------------------------------------------------------------------------------------------------------------------------------------------------------------------------------------------------------------------------------------------------------------------------------------------------------------------------------------------------------------------------------------------------------------------------------------------------------------------------------|-----------------------------------------------------------------------------------------------------------------------------------------------------------------------------------------------------------------------------------------------------------------------------------------------------------------------------------------------------------------------------------------------------------------------------------------------------------------------------------------------------------------------------------------------------------|------------------------------------------------------------------------------------------------------------------------------------------------------------------------------------------------------------------------------------------------------------------------------------------------------------------------------------------------------------------------------------------------------------|
| <b>Model</b>                        | Combination of: <ul style="list-style-type: none"> <li>District Clinical Specialist Team (DCST) evolving into regional and provincial level specialists</li> <li>District and sub-district programme managers</li> <li>Facility outreach within PHC system (mid-wife obstetric units (MOUs) to clinics)</li> <li>Weak role of tertiary hospital</li> </ul>                                                                                                                                                                                          | Combination of: <ul style="list-style-type: none"> <li>Cascade model from regional hospital specialists to district hospital generalists to PHC</li> <li>Central (provincial) coordination by tertiary level specialists in obstetric and neonatal ‘response teams’</li> <li>District and provincial programme managers</li> <li>Provincial partner for newborn and maternal health</li> </ul>                                                                                                                                                            | Combination of: <ul style="list-style-type: none"> <li>DCST plays major role (5 members)*</li> <li>District and sub-district programme managers</li> <li>Regional hospital outreach</li> <li>Facility clinical managers</li> <li>District PEPFAR partner supports in-service training</li> </ul>                                                                                                           |
| <b>Clinical care and mentorship</b> | <ul style="list-style-type: none"> <li>DCSTs run specialist outpatient clinics at district hospital, and provide telephonic support</li> <li>No outreach from tertiary hospital</li> <li>Advanced midwives in CHCs support PHC clinics</li> </ul>                                                                                                                                                                                                                                                                                                   | <ul style="list-style-type: none"> <li>Regional hospital specialists see ‘cold cases’ at district hospitals</li> <li>Tertiary level provides telephonic support through provincial response teams</li> <li>Uneven support for PHC from district hospitals</li> </ul>                                                                                                                                                                                                                                                                                      | <ul style="list-style-type: none"> <li>Regional hospital obstetricians support MOUs in surrounding sub-district</li> <li>DCSTs do limited clinical work</li> <li>Uneven support for PHC from district hospitals</li> </ul>                                                                                                                                                                                 |
| <b>In-service training</b>          | <ul style="list-style-type: none"> <li>Skills development plans at facility and sub-district level developed</li> <li>Established Regional Training Centre (RTC)</li> <li>Programme manager and DCST agree training targets with RTCs</li> </ul>                                                                                                                                                                                                                                                                                                    | <ul style="list-style-type: none"> <li>Training infrastructure and support through university partner for newborn health</li> <li>Virtual and face to face programmes through the response teams</li> <li>On site skills development and mentoring (surgical and anaesthetic)</li> </ul>                                                                                                                                                                                                                                                                  | <ul style="list-style-type: none"> <li>Annual 3-week programme of skills development for community service doctors arranged by DCST</li> <li>Relies on clinical manager initiative in district hospital</li> <li>Programme managers organise training for PHC</li> </ul>                                                                                                                                   |
| <b>Audit, M&amp;E</b>               | <ul style="list-style-type: none"> <li>Facility audit tools developed by programme manager</li> <li>Perinatal mortality meetings conducted within facilities</li> <li>Confidential enquiries into maternal deaths</li> <li>Quarterly general clinic assessments (Ideal Clinic programme)</li> <li>Operational managers meet monthly in each sub-district to review indicators, and quarterly at district level as part of routine performance reviews</li> <li>Lack of MNCH specific district forum and loss of district programme staff</li> </ul> | <ul style="list-style-type: none"> <li>Performance Monitoring and Response Forums (PMRF) meet monthly in catchment areas of sub-districts and district, with a focus on MNCH               <ul style="list-style-type: none"> <li>Conduct real-time maternal and neonatal mortality surveillance and appropriate responses</li> </ul> </li> <li>Provincial-level maternal death audits</li> <li>Provincial Maternal Health Standards launched in 2019</li> <li>Facility Assessment Tools (FAST) for neonatal care developed by support partner</li> </ul> | <ul style="list-style-type: none"> <li>Programme managers and DCST conduct facility audits and district reviews</li> <li>Joint PHC, district hospital perinatal mortality review meetings</li> <li>Confidential enquiries into maternal deaths</li> <li>Vula app provides opportunity for systematic collection of data on referral system</li> <li>General district quarterly review processes</li> </ul> |

\*paediatric nurse, paediatrician, PHC nurse, O&G Specialist and anaesthetist
